# Supplementary material for: Country and species-dependent parameters for the Heating Degree Day method to distribute NO x and PM emissions from residential heating in the EU-27: application to air quality modelling and multi-year emission projections
Source: Copernicus journal article supplement (doi:10.5194/egusphere-2024-2911), 2024-10-18
Supplement: Supplementary file 1 [file egusphere-2024-2911-supplement.pdf]

## Supplement

**Table S1.** Value of  $Tb_{fit}$ ,  $f_{NOx}$  and  $f_{PM}$  for each EU-27 country. The missing data for the calculation of  $f_{spec.}$  have been replaced by the European average available (numbers underlined).

| Country     | $Tb_{fit}$ | $f_{NOx}$   | $f_{PM}$ |
|-------------|------------|-------------|----------|
| Austria     | 15.92      | 0.12        | 0.07     |
| Belgium     | 15.92      | 0.16        | 0.01     |
| Bulgaria    | 15.65      | 0.19        | 0.04     |
| Croatia     | 15.82      | 0.27        | 0.05     |
| Cyprus      | 15.35      | <u>0.25</u> | 0.02     |
| Czechia     | 15.58      | 0.35        | 0.04     |
| Denmark     | 15.03      | 0.28        | 0.06     |
| Estonia     | 12.49      | 0.27        | 0.12     |
| Finland     | 11.99      | 0.22        | 0.24     |
| France      | 15.96      | 0.17        | 0.04     |
| Germany     | 15.45      | 0.21        | 0.07     |
| Greece      | 15.60      | 0.13        | 0.01     |
| Hungary     | 17.69      | 0.17        | 0.01     |
| Ireland     | 15.39      | 0.29        | 0.12     |
| Italy       | 15.68      | 0.25        | 0.04     |
| Latvia      | 11.49      | 0.48        | 0.15     |
| Lithuania   | 13.52      | 0.34        | 0.07     |
| Luxembourg  | 15.67      | 0.12        | 0.02     |
| Malta       | 15.57      | <u>0.25</u> | 0.01     |
| Netherlands | 15.43      | 0.23        | 0.01     |
| Poland      | 15.10      | 0.47        | 0.10     |
| Portugal    | 15.52      | 0.94        | 0.29     |
| Romania     | 16.63      | 0.41        | 0.23     |
| Slovakia    | 16.14      | 0.20        | 0.25     |
| Slovenia    | 15.85      | 0.27        | 0.22     |
| Spain       | 15.62      | 0.54        | 0.11     |
| Sweden      | 11.99      | 0.24        | 0.11     |

**Table S2.** Characteristics of domestic gas data-sets from the ENTSOG Transparency platform. For each country, the gas supplier used and the period covered by the data are detailed.

| Country     | Gas supplier   | Time cover |
|-------------|----------------|------------|
| Hungary     | FGSZ           | 2019-2021  |
| Roumania    | Transgas       | 2018-2021  |
| Italy       | Snam Rete Gas  | 2016-2021  |
| France      | GRTgas         | 2016-2021  |
| Belgium     | Fluxys Belgium | 2016-2021  |
| Netherlands | GTS            | 2016-2021  |
| Latvia      | Conexus        | 2020-2021  |
| Estonia     | Elering Gaas   | 2016-2021  |

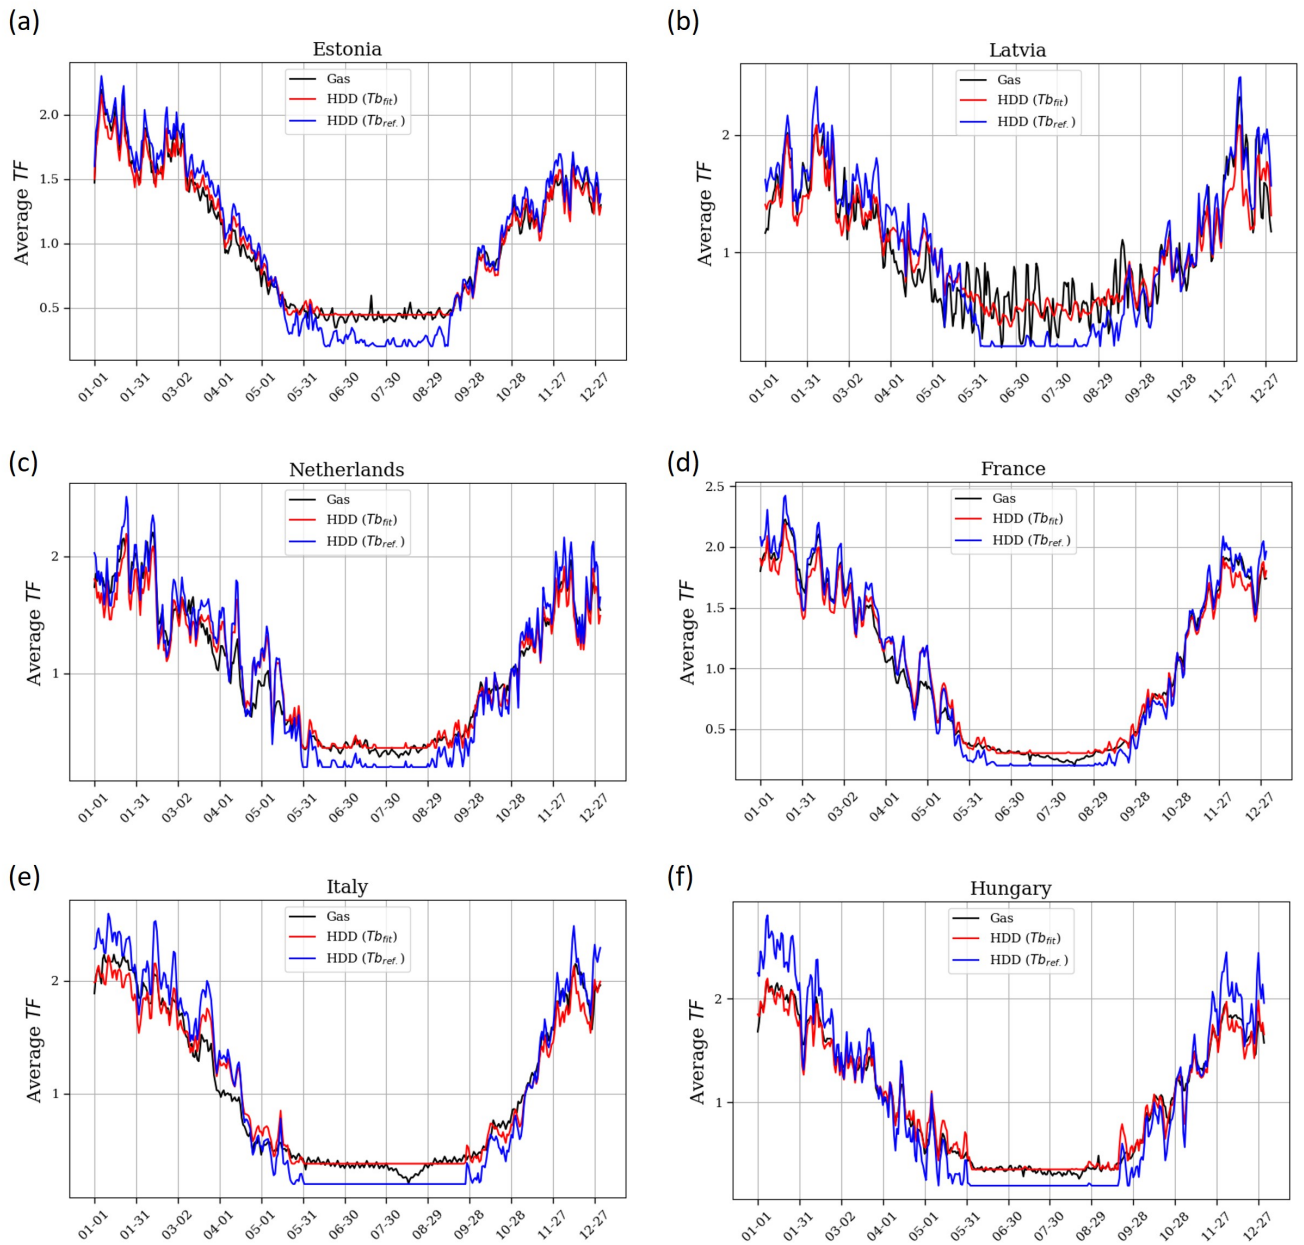

**Figure S1.** Daily evolution of  $TF(c)$  (unitless) for gas consumption (in black), for HDDs with  $Tb_{fit}$  (in red) and for HDDs with  $Tb_{ref.}$  (in blue).  $TF(c)$  is averaged over the period 2018-2021 for Estonia (a), over 2020-2021 for Latvia (b), over 2016-2021 for Netherlands (c), over 2016-2021 for France (d), over 2016-2021 for Italy (e) and over 2019-2021 for Hungary (f).

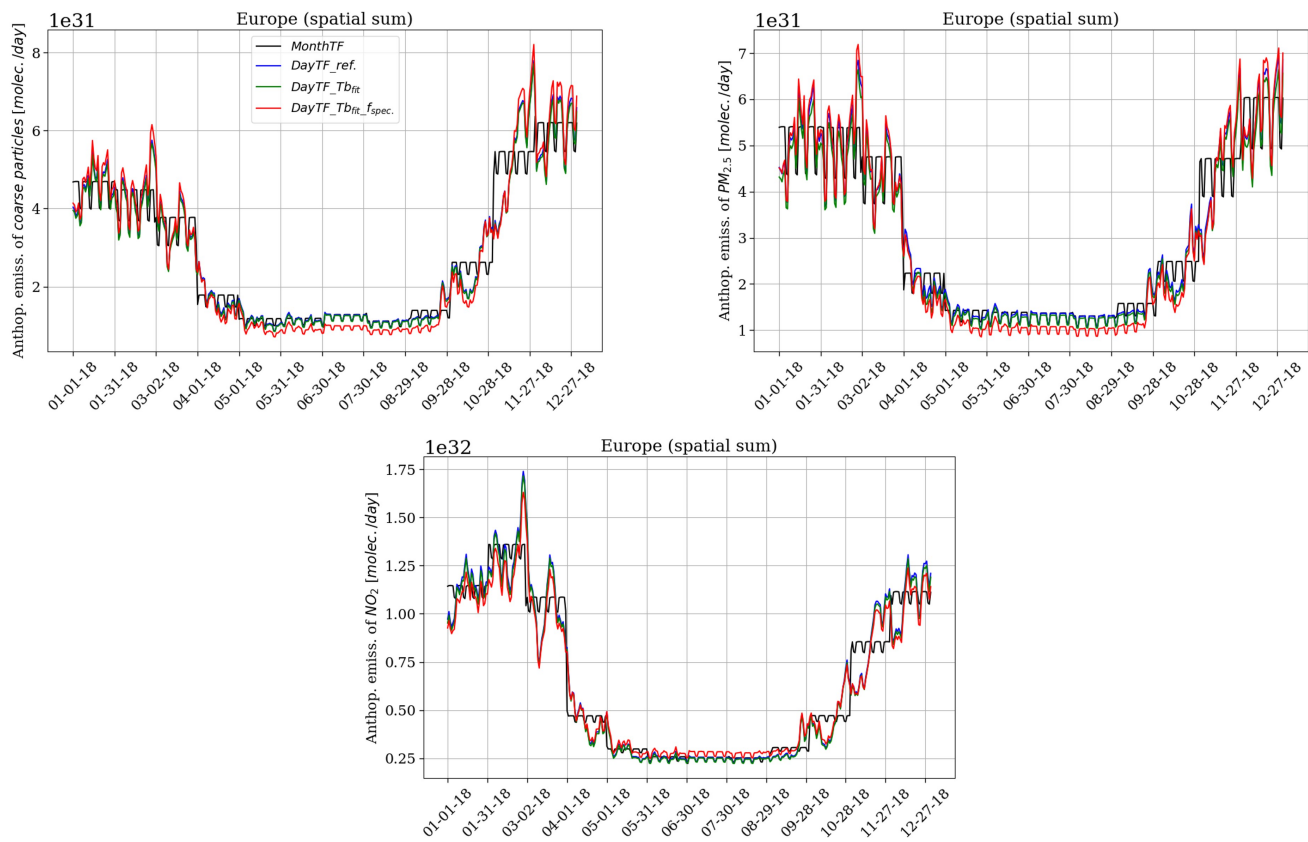

**Figure S2.** Time series at daily time step of total anthropogenic emissions of coarse particles (top left), fine particles (top right) and  $\text{NO}_2$  (bottom) in Europe for the different experiments detailed in Table 2.

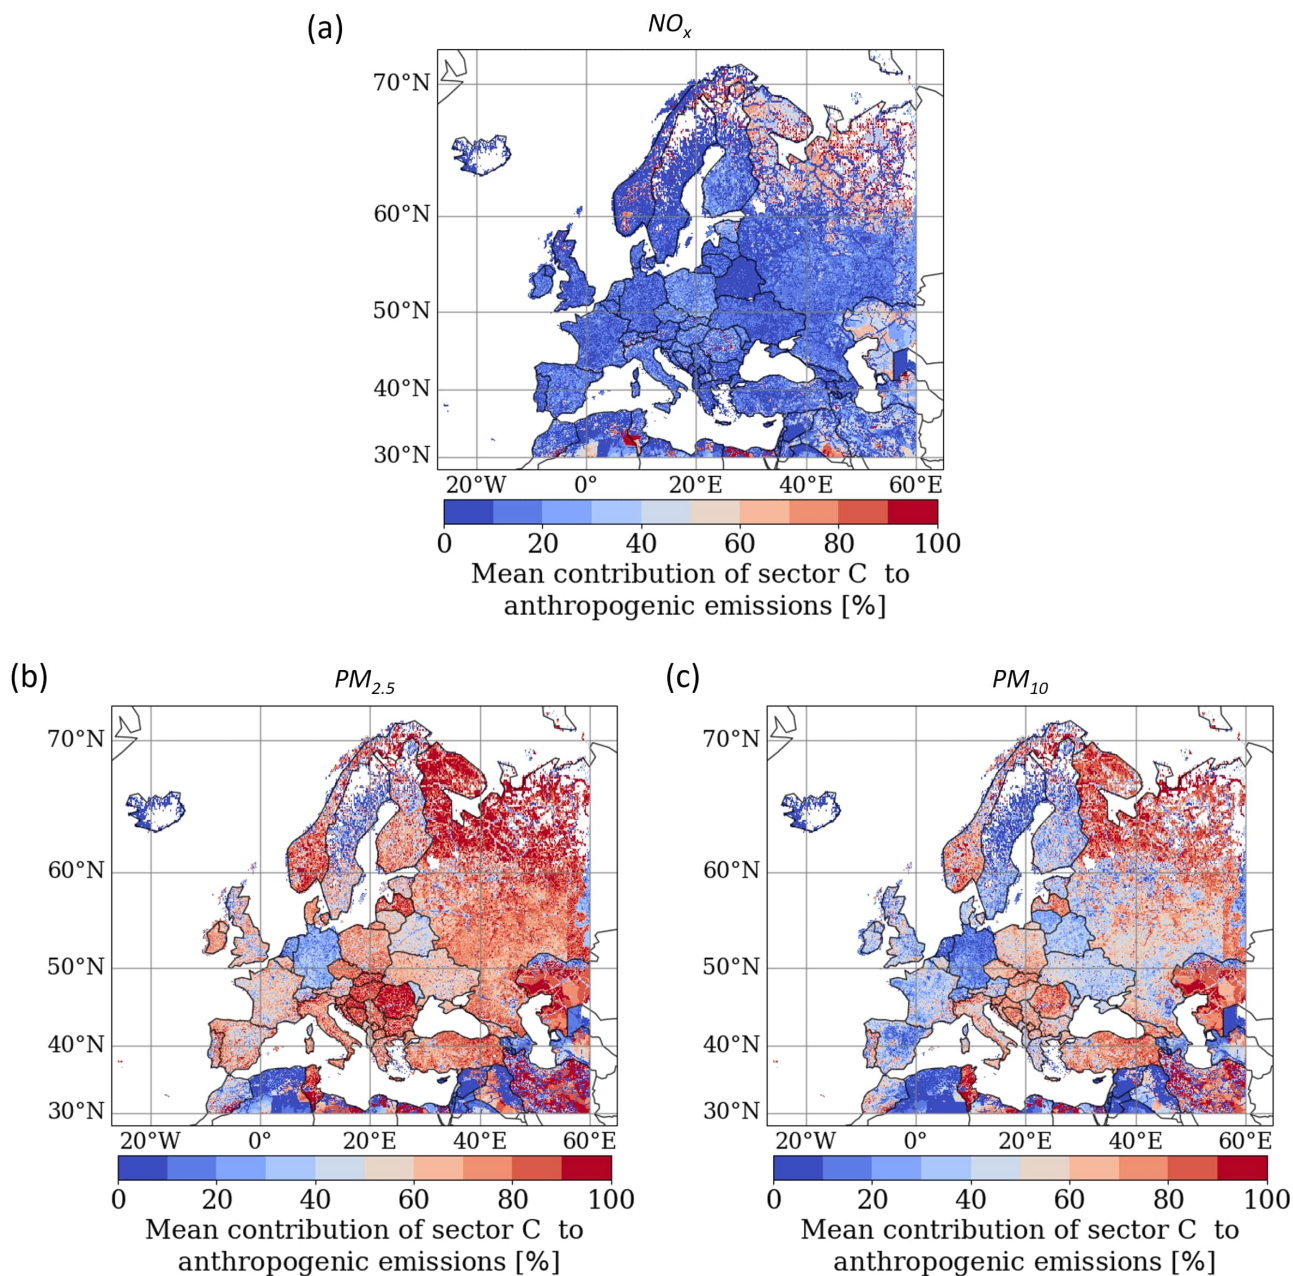

**Figure S3.** Spatial distribution of the average contribution of GNFR sector "Other stationary combustions" (C) to total anthropogenic emissions for  $NO_x$  (a),  $PM_{2.5}$  (b) and  $PM_{10}$  (c) species over the period 2009-2018, based on the CAMS-REG-AP-v5.1 inventory (Kuenen et al., 2022).

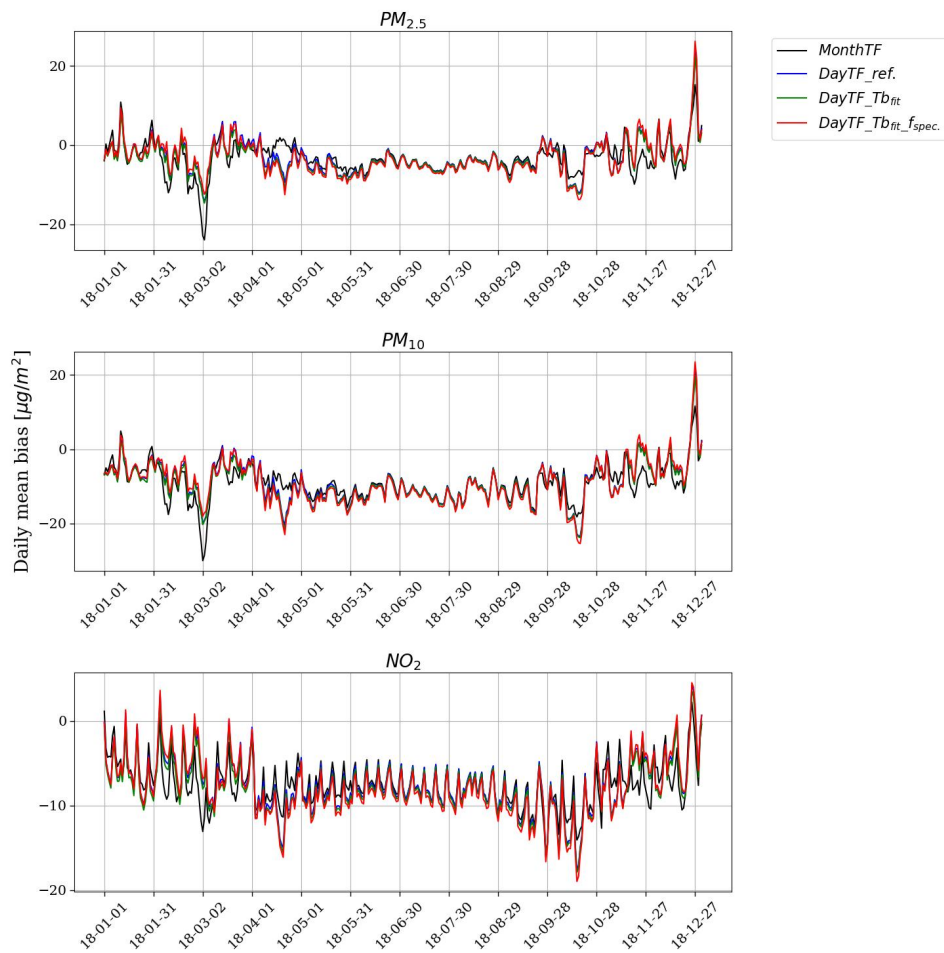

**Figure S4.** Evolution in 2018 of the daily average bias [ $\mu\text{g}/\text{m}^3$ ] over the European domain between the CHIMERE simulations and the AQ e-Reporting observation stations of  $PM_{2.5}$  (a),  $PM_{10}$  (b) and  $NO_2$  (c).

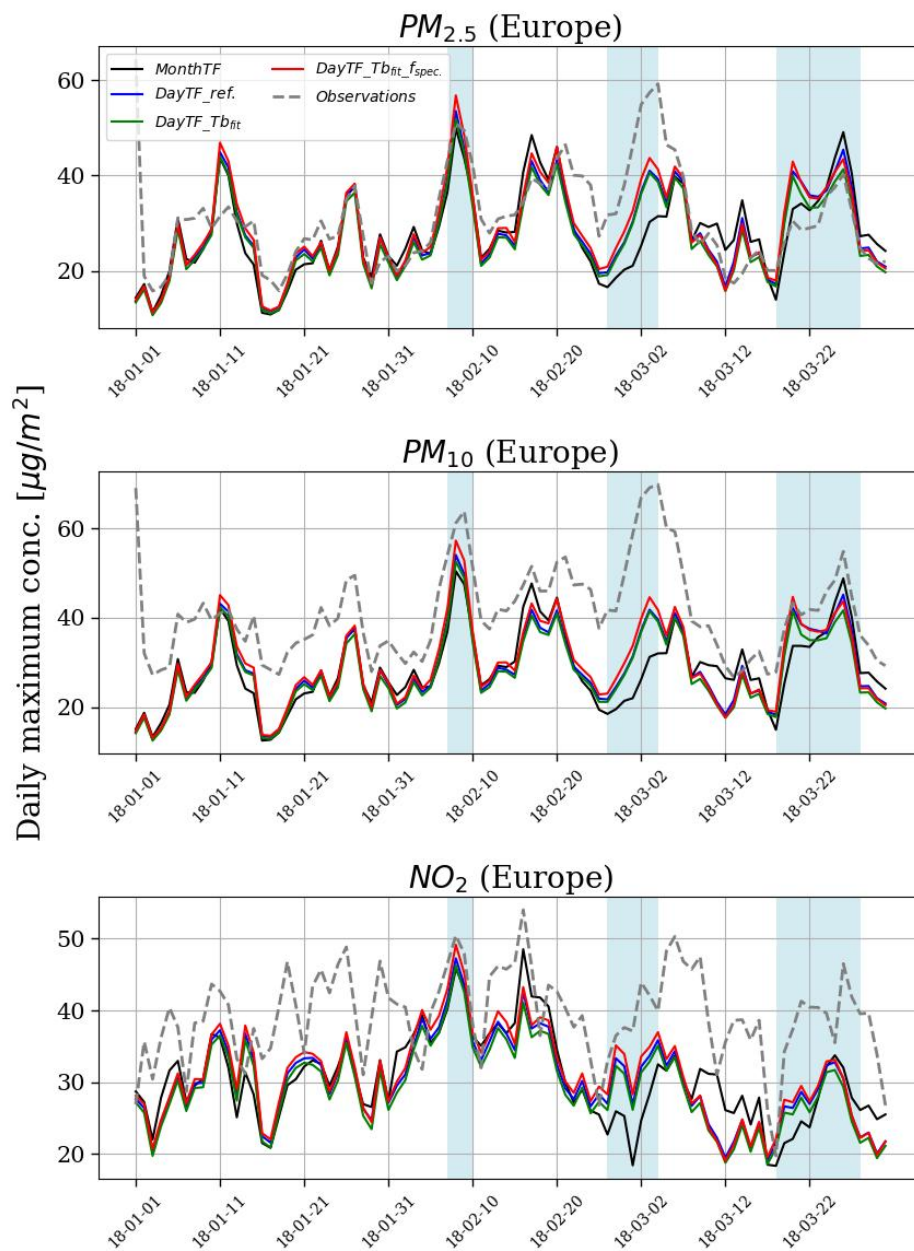

**Figure S5.** Daily maximum concentrations of  $PM_{2.5}$  (top),  $PM_{10}$  (middle) and  $NO_2$  (bottom) in Europe between January and March from observations (AQ-eReporting) and different CHIMERE experiments. The blue areas indicate periods of intense cold as signaled by the Climate Copernicus service.



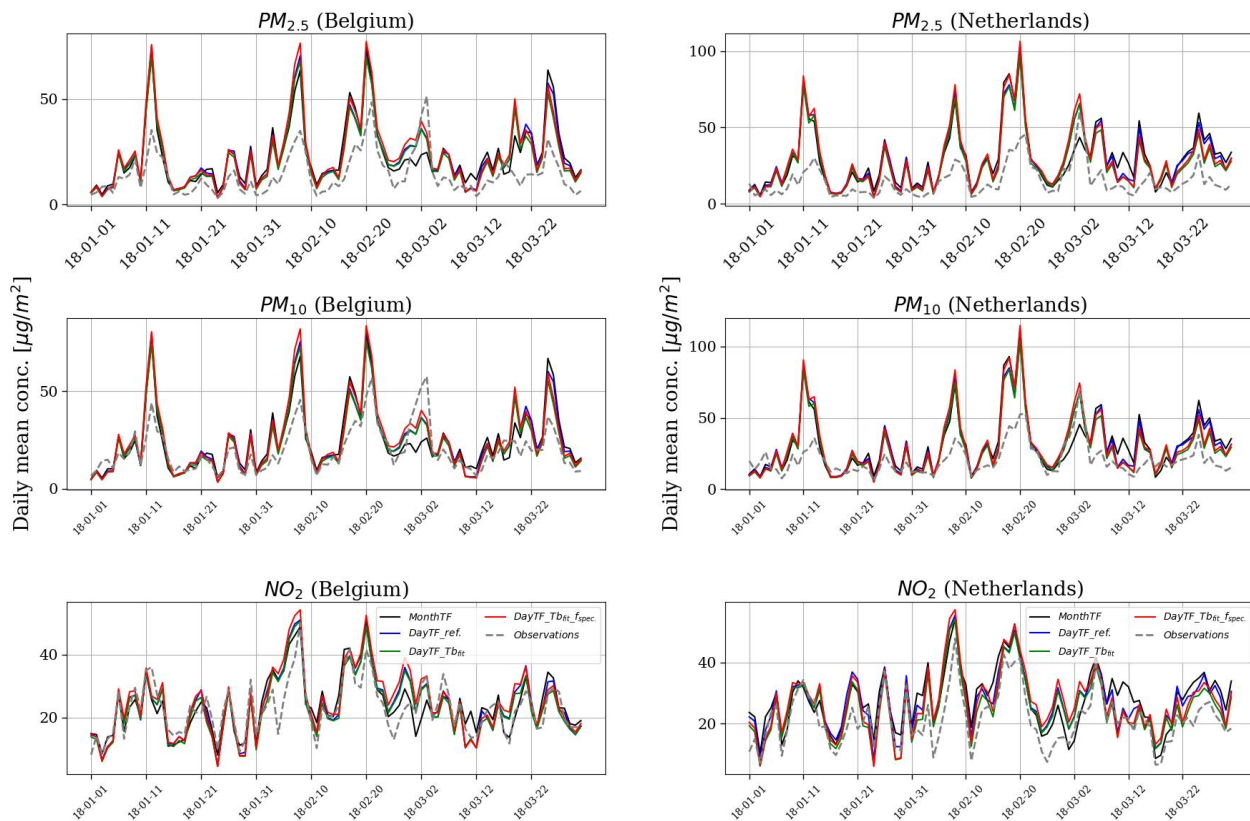

**Figure S6.** Average daily concentrations of  $PM_{2.5}$  (top),  $PM_{10}$  (middle) and  $NO_2$  (bottom) in Belgium (left) and Netherlands (right) between January and March from observations (AQ-eReporting) and different CHIMERE simulations.



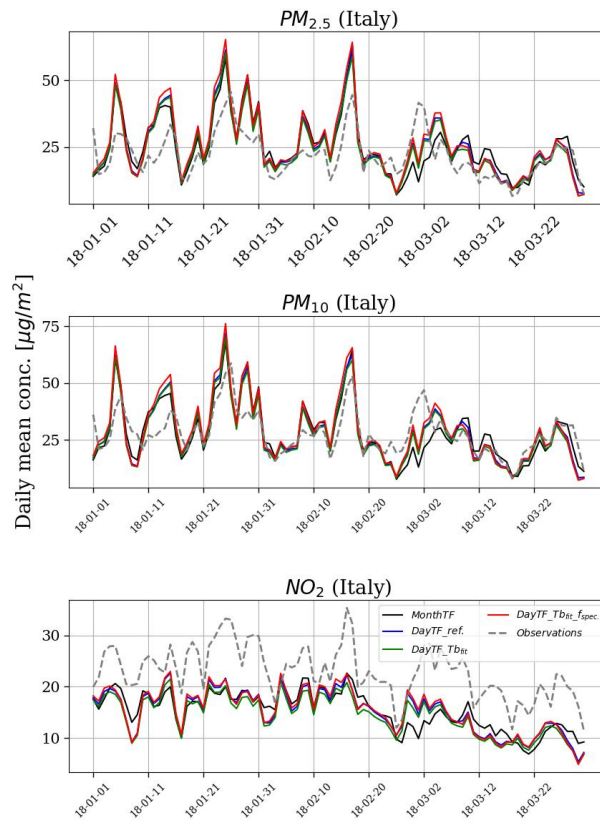

**Figure S7.** Same as Figure S6 for Italy.

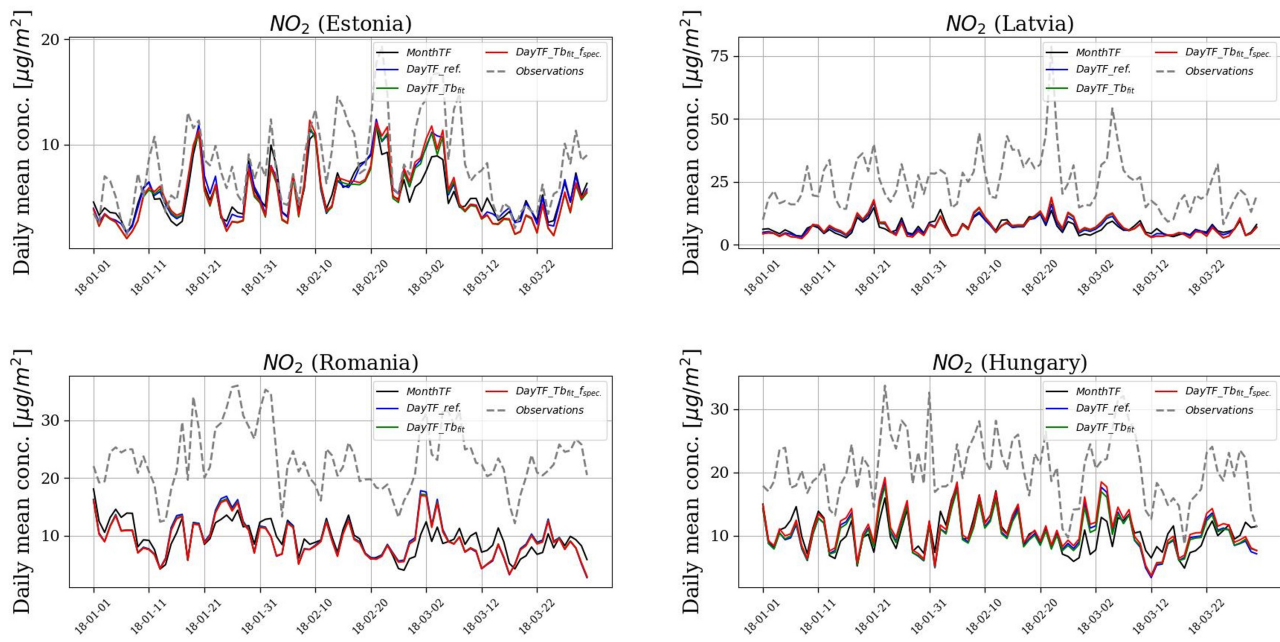

**Figure S8.** Average daily concentrations of  $\text{NO}_2$  in Estonia (upper left), Latvia (upper right), Romania (lower left) and Hungary (lower right) between January and March from observations (AQ-eReporting) and different CHIMERE simulations.

$PM_{10}$

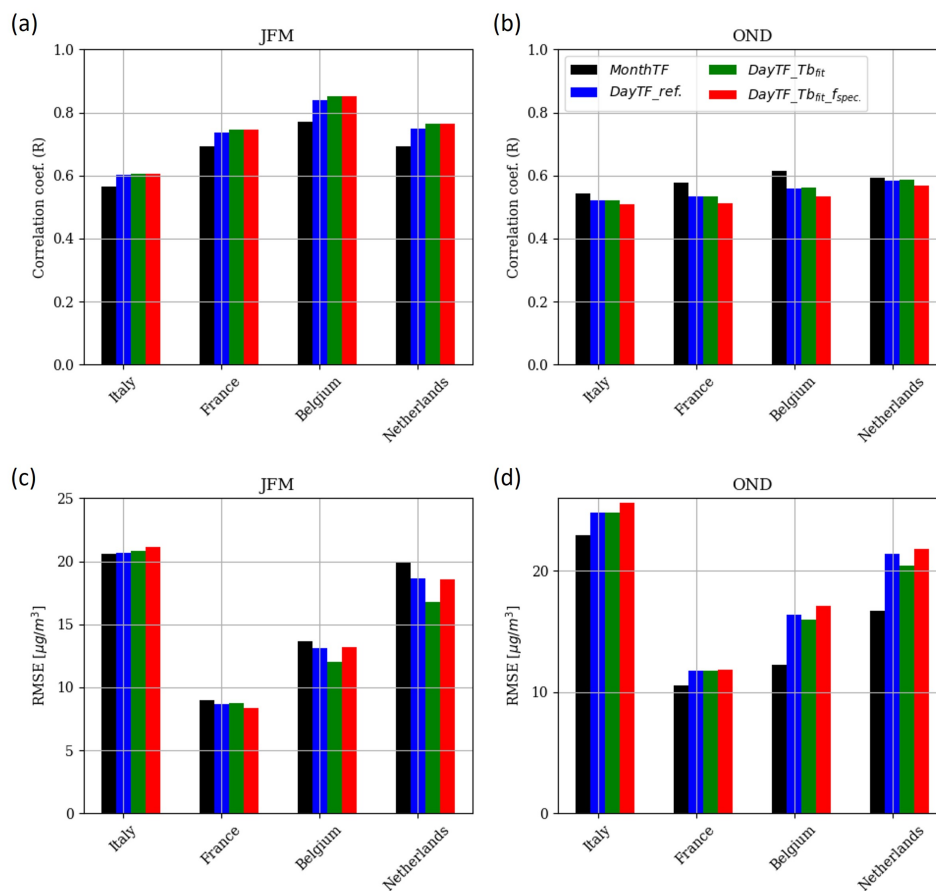

**Figure S9.** Spearman correlation (R coefficient) and RMSE ( $\mu g/m^3$ ) of hourly  $PM_{10}$  concentrations for the months JFM (panel (a) and (c) respectively) and OND (panel (b) and (d) respectively), averaged over stations in countries that have been fitted with gas consumption data and for which concentration measurements are available.

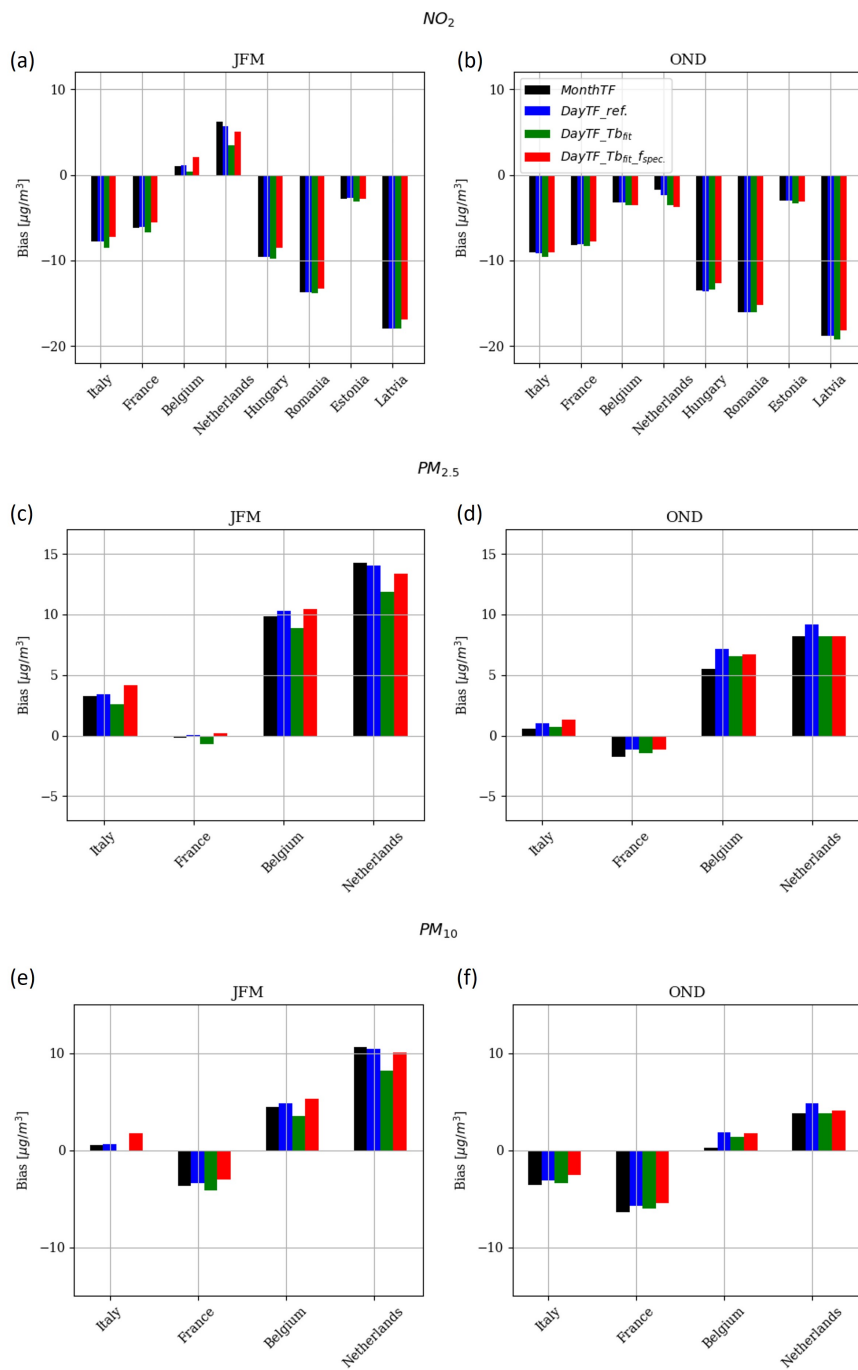

**Figure S10.** Average bias ( $\mu\text{g}/\text{m}^3$ ) of hourly  $NO_2$ ,  $PM_{2.5}$ ,  $PM_{10}$  concentrations for the months JFM (panel (a), (c), (e) respectively) and OND (panel (b), (d), (f) respectively), averaged over stations in countries that have been fitted with gas consumption data and for which concentration measurements are available.

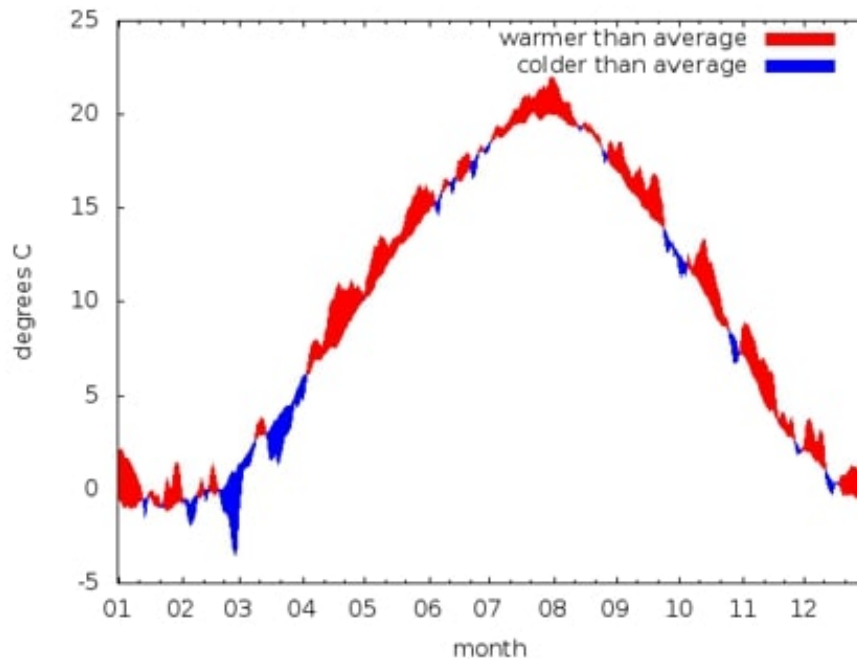

**Figure S11.** Daily anomalies of the European mean surface temperature for 2018, relative to 1981-2010. Data source: E-OBS, Credit: Copernicus Climate Change Service (C3S)/KNMI (<https://climate.copernicus.eu/cold-start-year>).

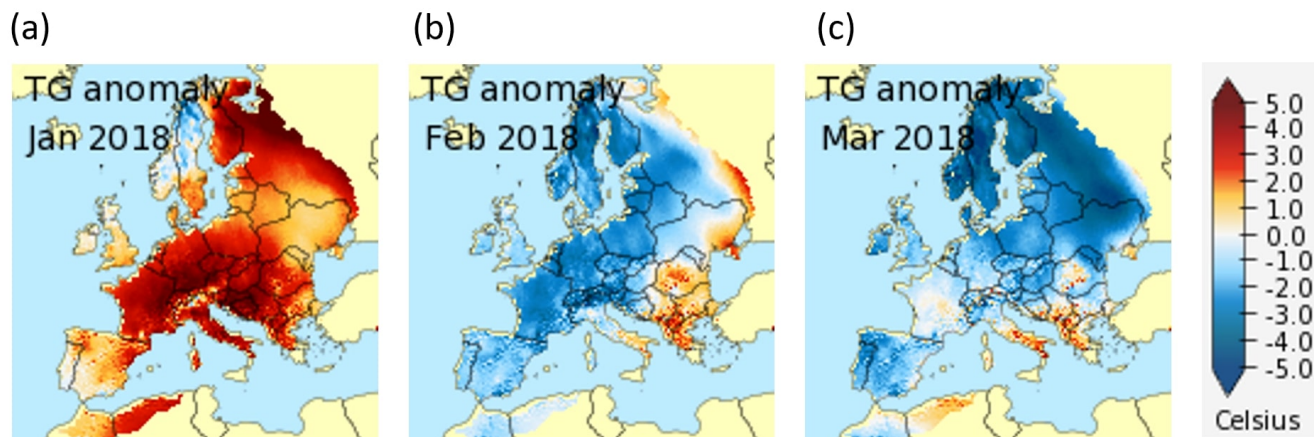

**Figure S12.** Differences of average temperature between January 2018 (a), February 2018 (b) and March 2018 (c), and the reference period 1981-2010. Data source: E-OBS, Credit: Copernicus Climate Change Service (C3S)/KNMI (<https://surfofs.climate.copernicus.eu/stateoftheclimate/>).

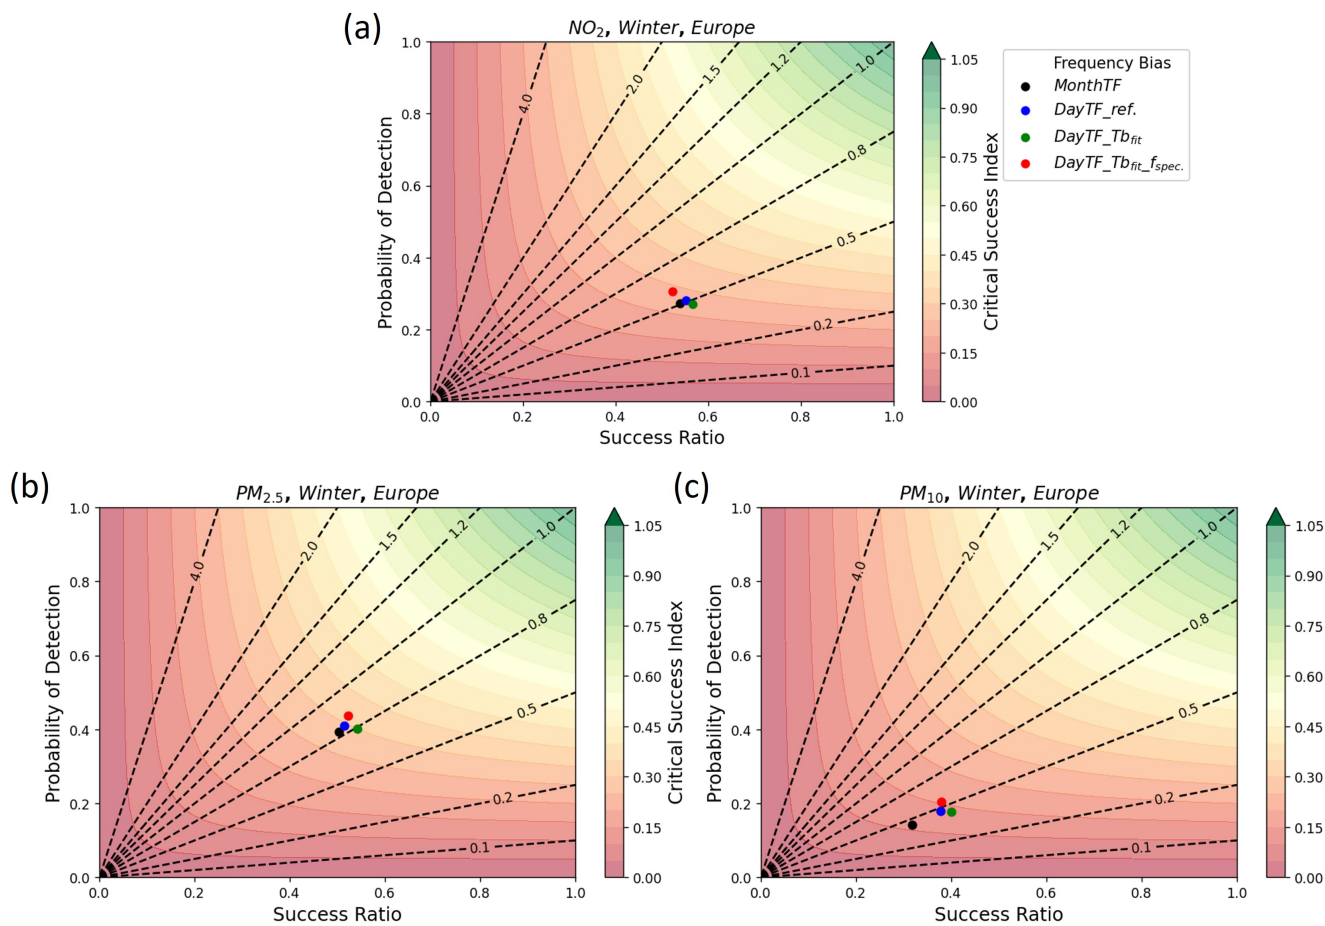

**Figure S13.** Performance diagram, as designed by Roebber (2009), comparing the ability to simulate the threshold exceedance (as a daily average) for the different experiments for  $NO_2$  (a),  $PM_{2.5}$  (b) and  $PM_{10}$  (c) averaged over Europe during the JFM months. The probability of detection is shown on the vertical axis, the success ratio on the horizontal axis, the frequency bias by the dashed line and the critical success index by the curved lines.



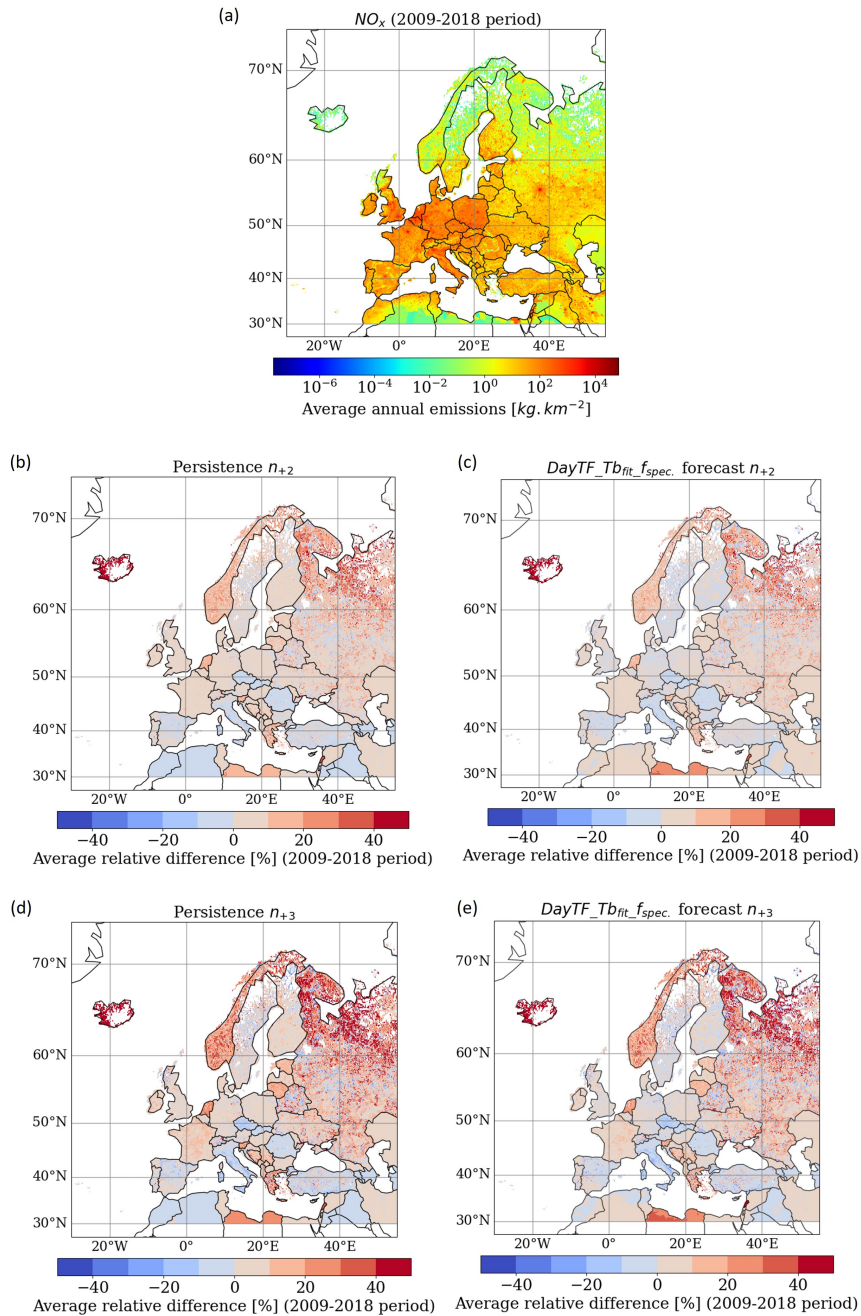

**Figure S14.** Spatial distribution of average annual  $NO_x$  emissions [ $kg/km^2$ ] from  $GNFR\_C$  (2009-2018 period), based on the CAMS-REG-AP-v5.1 inventory (a). Average relative difference using "DayTF\_Tb\_fit\_spec." to project in  $n_{+2}$  (b) in  $n_{+3}$  (d) for each year between 2009 and 2019, compared to the reported emissions. Average relative difference using the persistence method for  $n_{+2}$  (c) and  $n_{+3}$  (e) over 2009-2018.
